# Supplementary material for: Minor Changes in Erythrocyte Osmotic Fragility in Trace Amine-Associated Receptor 5 (TAAR5) Knockout Mice
Source: MDPI journal article supplement (doi:10.3390/ijms22147307), 2021-07-07
Supplement: s1 [file s1]

**Supplementary Table S1.** Comparative OFT analysis of TAAR5-KO and WT mice.

Data are Mean  $\pm$  SEM, TAAR5 homozygous knock-out group, (n=13); TAAR5 heterozygous group (n=6) and wild type control group, (n=11).

| NaCl | WT     |        |        |        |        |        |        |        |        |        |        |        |        |
|------|--------|--------|--------|--------|--------|--------|--------|--------|--------|--------|--------|--------|--------|
| 0.25 | 100.00 | 100.00 | 100.00 | 100.00 | 100.00 | 100.00 | 100.00 | 100.00 | 100.00 | 100.00 | 100.00 |        |        |
| 0.35 | 100.00 | 100.00 | 92.05  | 100.00 | 98.28  | 84.86  | 95.23  | 91.56  | 89.86  | 100.00 | 95.36  |        |        |
| 0.4  | 93.13  | 93.64  | 92.83  | 99.29  | 99.68  | 93.95  | 94.68  | 93.43  | 86.97  | 100.00 | 93.61  |        |        |
| 0.45 | 65.44  | 92.08  | 92.00  | 95.00  | 85.57  | 84.38  | 93.76  | 90.08  | 84.20  | 94.62  | 100.00 |        |        |
| 0.5  | 76.52  | 81.10  | 86.54  | 79.55  | 83.17  | 75.82  | 85.44  | 79.38  | 76.17  | 95.72  | 79.25  |        |        |
| 0.55 | 71.71  | 59.47  | 83.84  | 41.54  | 81.85  | 61.09  | 88.30  | 77.36  | 69.29  | 91.07  | 78.66  |        |        |
| 0.65 | 13.02  | 18.06  | 29.24  | 3.83   | 13.62  | 11.28  | 22.29  | 14.30  | 19.26  | 25.08  | 17.88  |        |        |
| NaCl | HET    |        |        |        |        |        |        |        |        |        |        |        |        |
| 0.25 | 100.00 | 100.00 | 100.00 | 100.00 | 100.00 | 100.00 |        |        |        |        |        |        |        |
| 0.35 | 91.99  | 93.21  | 91.57  | 96.97  | 100.00 | 100.00 |        |        |        |        |        |        |        |
| 0.4  | 86.91  | 97.08  | 96.31  | 93.68  | 100.00 | 100.00 |        |        |        |        |        |        |        |
| 0.45 | 85.43  | 93.68  | 93.44  | 94.17  | 100.00 | 89.96  |        |        |        |        |        |        |        |
| 0.5  | 70.83  | 87.45  | 91.27  | 94.41  | 94.57  | 89.96  |        |        |        |        |        |        |        |
| 0.55 | 63.37  | 66.15  | 79.21  | 77.11  | 92.21  | 86.80  |        |        |        |        |        |        |        |
| 0.65 | 16.14  | 11.34  | 16.92  | 7.87   | 39.18  | 17.38  |        |        |        |        |        |        |        |
| NaCl | KO     |        |        |        |        |        |        |        |        |        |        |        |        |
| 0.25 | 100.00 | 100.00 | 100.00 | 100.00 | 100.00 | 100.00 | 100.00 | 100.00 | 100.00 | 100.00 | 100.00 | 100.00 | 100.00 |
| 0.35 | 100.00 | 100.00 | 93.12  | 93.87  | 86.55  | 98.79  | 97.39  | 94.38  | 97.85  | 93.88  | 96.46  | 95.53  | 94.80  |
| 0.4  | 100.00 | 98.30  | 90.98  | 99.00  | 90.44  | 100.00 | 100.00 | 94.93  | 98.53  | 97.66  | 98.89  | 97.07  | 92.49  |
| 0.45 | 100.00 | 95.07  | 87.85  | 87.32  | 79.65  | 98.44  | 98.62  | 95.89  | 94.41  | 103.03 | 97.95  | 94.57  | 96.61  |
| 0.5  | 86.39  | 90.12  | 85.79  | 85.82  | 71.23  | 93.76  | 100.00 | 93.72  | 97.06  | 96.39  | 93.94  | 92.95  | 99.84  |
| 0.55 | 85.66  | 79.44  | 77.77  | 72.20  | 69.50  | 94.76  | 89.52  | 85.09  | 97.66  | 89.88  | 91.39  | 89.06  | 77.71  |
| 0.65 | 14.80  | 9.43   | 11.18  | 16.54  | 23.12  | 31.16  | 15.38  | 23.40  | 40.53  | 48.48  | 33.59  | 54.09  | 23.95  |

**Supplementary Table S2.** Comparative hematological analysis of TAAR5-KO and WT mice.

Data are Mean  $\pm$  SEM, TAAR5 homozygous knock-out group, (n=14); TAAR5 heterozygous group (n=6) and wild type control group, (n=20).

| Parameters<br>(units) | WT                | HET               | KO                |
|-----------------------|-------------------|-------------------|-------------------|
| RBC(M/ul)             | 7.8 $\pm$ 0.21    | 8.44 $\pm$ 0.27   | 7.93 $\pm$ 0.55   |
| Hgb(g/dL)             | 11.11 $\pm$ 0.91  | 11.45 $\pm$ 1.46  | 11.89 $\pm$ 0.49  |
| HCT(%)                | 39.65 $\pm$ 1.46  | 44.72 $\pm$ 2.32  | 45.27 $\pm$ 1.41  |
| MCV(fL)               | 52.31 $\pm$ 0.91  | 56.78 $\pm$ 1.45  | 53.7 $\pm$ 0.58   |
| MCH(pg)               | 14.59 $\pm$ 0.37  | 14.4 $\pm$ 0.29   | 14.06 $\pm$ 0.26  |
| MCHC(g/dL)            | 28.16 $\pm$ 1.06  | 25.43 $\pm$ 0.65  | 26.21 $\pm$ 0.47  |
| RDW(%)                | 16.42 $\pm$ 0.56  | 15.7 $\pm$ 1.05   | 15.39 $\pm$ 0.76  |
| nRBC(k/ul)            | 0.00              | 0.00              | 0.00              |
| WBC(k/ul)             | 5.28 $\pm$ 0.60   | 5.44 $\pm$ 0.51   | 4.56 $\pm$ 0.44   |
| NE(k/ul)              | 1.4 $\pm$ 0.24    | 1.27 $\pm$ 0.30   | 1.34 $\pm$ 0.29   |
| LY(k/ul)              | 3.15 $\pm$ 0.41   | 3.03 $\pm$ 0.46   | 2.70 $\pm$ 0.32   |
| MO(k/ul)              | 0.10 $\pm$ 0.01   | 0.16 $\pm$ 0.03   | 0.13 $\pm$ 0.03   |
| EO(k/ul)              | 0.35 $\pm$ 0.05   | 0.42 $\pm$ 0.01   | 0.22 $\pm$ 0.04   |
| BA(k/ul)              | 0.02 $\pm$ 0.01   | 0.03 $\pm$ 0.01   | 0.03 $\pm$ 0.01   |
| PLT(k/ul)             | 1268 $\pm$ 60.11  | 1578 $\pm$ 172.4  | 1285 $\pm$ 66.54  |
| MPV(fL)               | 8.364 $\pm$ 0.97  | 6.917 $\pm$ 0.40  | 7.214 $\pm$ 0.51  |
| Retic                 | 336.6 $\pm$ 35.98 | 294.3 $\pm$ 52.73 | 335.8 $\pm$ 38.02 |
| LUC                   | 0.52 $\pm$ 0.14   | 0.04 $\pm$ 0.01   | 0.51 $\pm$ 0.22   |
